## Label-free three-dimensional analyses of live cells with deep-learning-based segmentation exploiting refractive index distributions

Jinho Choi<sup>1+</sup>, Hye-Jin Kim<sup>1+</sup>, Gyuhyeon Sim<sup>4</sup>, Sumin Lee<sup>1</sup>, Wei Sun Park<sup>2,4</sup>, Jun Hyung Park<sup>1</sup>, Ha-Young Kang<sup>1</sup>, Moosung Lee<sup>4,5</sup>, Won Do Heo<sup>2</sup>, Jaegul Choo<sup>3,\*</sup>, Hyunseok Min<sup>1,\*</sup>, and YongKeun Park<sup>4,5,\*</sup>

<sup>1</sup>Tomocube Inc., Daejeon 34051, Republic of Korea

<sup>2</sup>Department of Biological Sciences, KAIST, Daejeon 34141, Republic of Korea

<sup>3</sup>Graduate School of Artificial Intelligence, KAIST, Daejeon 34141, Republic of Korea

<sup>4</sup>Department of Physics, Korea Advanced Institute of Science and Technology (KAIST), Daejeon 34141, Republic of Korea

<sup>5</sup>KAIST Institute for Health Science and Technology, KAIST, Daejeon 34141, Republic of Korea

<sup>+</sup>These authors contributed equally to this work.

\*corresponding authors: [jchoo@kaist.ac.kr](mailto:jchoo@kaist.ac.kr), [hmin@tomocube.com](mailto:hmin@tomocube.com) or [yk.park@kaist.ac.kr](mailto:yk.park@kaist.ac.kr)

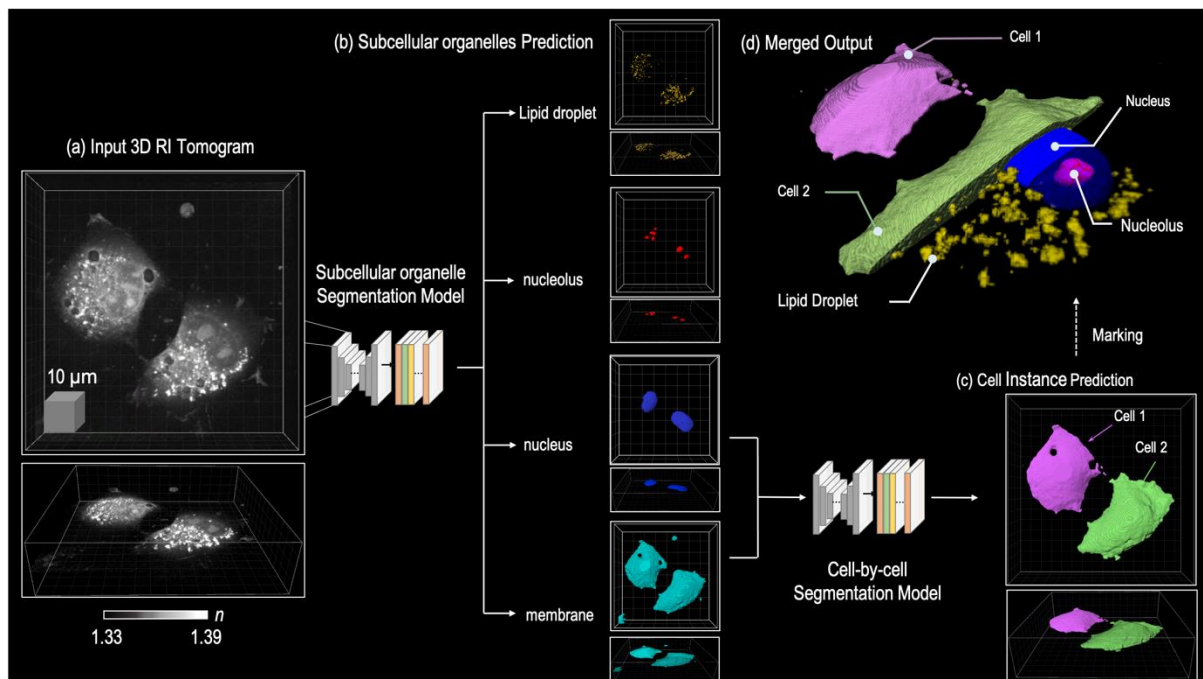

1 Abstract

2 Visualisations and analyses of cellular and subcellular organelles in biological cells is crucial for the study of  
3 cell biology. However, existing imaging methods require the use of exogenous labelling agents, which prevents  
4 the long-time assessments of live cells in their native states. Here we propose and experimentally demonstrate  
5 three-dimensional segmentation of subcellular organelles in unlabelled live cells, exploiting a 3D U-Net-based  
6 architecture. We present the high-precision three-dimensional segmentation of cell membrane, nucleus  
7 membrane, nucleoli, and lipid droplets of various cell types. Time-lapse analyses of dynamics of activated  
8 immune cells are also analysed using label-free segmentation.

9

## 10 **Introduction**

11 There is a high demand for the quantification of the morphological dynamics in a live cell and its subcellular  
12 organelles among numerous research topics in quantitative cell biology<sup>1,2</sup>. Recent advances in microscopic  
13 techniques have created a new era for image-based cell volume quantification<sup>3-5</sup>. Fluorescence-based confocal  
14 imaging is the most popular for live-cell quantification, offering high flexibility of organelle markers and  
15 correlated fluorophores.

16 Quantitative phase imaging (QPI) is a powerful method to observe the morphology of a live specimen without  
17 any perturbation; this includes dye staining or fluorescence protein expression<sup>6</sup>. Recently developed three  
18 dimensional (3D) QPI techniques provide the 3D refractive index (RI) distributions, containing quantitative  
19 information on the concentration of a material, and have been exploited in various applications including  
20 biomolecular condensates<sup>7</sup>, biotechnology<sup>8</sup>, microbiology<sup>9</sup>, and cell biology<sup>10</sup>. Although the 3D QPI image can  
21 provide the physical properties corresponding to each voxel, a universal and versatile segmentation method is  
22 required to simultaneously monitor quantitative dynamics in a whole cell and its organelles. To this end, there is  
23 a need for techniques to discriminate specific organelles within a cell and discriminate each cell unit from its  
24 neighbouring cells.

25 To provide such a cell segmentation mask in 3D QPI, previous works have widely used conventional approaches  
26 such as the threshold-based Otsu segmentation, transforming a 3D image to a two-dimensional (2D) image by  
27 maximum intensity projection, and filtering in 3D volume organelle segmentation<sup>11-13</sup>. However, this algorithm  
28 may rarely be applied to the organelle segmentation of QPI images due to the lack of organelle specificity from  
29 the intensity and the low variation of numerical contrast. As the RI is an intrinsic value determined exclusively  
30 by the concentration of a certain material, the RI range can easily overlap among different compartments within  
31 a cell.

32 In recent years, machine learning techniques based on cell and organelle morphology have been adopted to  
33 overcome these problems in 3D QPI imagery. In particular, deep-learning approaches based on a large amount  
34 of data rather than specific features have been utilised, including nucleus segmentation<sup>14</sup>, spermatozoon  
35 segmentation<sup>15</sup>, and lipid droplet segmentation<sup>16</sup>. These semantic segmentation methods should use single-cell  
36 images for cell analysis due to the absence of a method to distinguish individual cell units. To overcome this  
37 limitation of semantic segmentation in cellular studies, several studies have proposed cell-by-cell segmentation

38 to track the immunological synapse of immune cells<sup>17</sup> or analyse sperm cells<sup>15</sup>. However, as these methods  
39 mainly focus on the segmentation of specific cell types or organelles, their applicability is limited in a few  
40 analyses. To be used in various applications, it is necessary to develop a robust model that accurately segments  
41 individual cells and organelles among numerous cell types.

42 This study presents a universal framework for the label-free, quantitative analysis of live cells; this study has  
43 three major contributions. First, to simultaneously monitor the quantitative dynamics of whole cells and  
44 organelles, an automatic segmentation framework using deep learning and cell characteristics in 3D QPI images  
45 was proposed. The proposed automated segmentation framework consists of a "multi-organelle segmentation"  
46 model that segments multiple organelles within a cell and a "cell-by-cell segmentation" model that distinguishes  
47 individual cells from neighbouring cells. Second, we verified that this model has spatio-temporal robustness  
48 among numerous adherent and suspension cell lines, popular among biologists. The proposed framework did not  
49 target a specific organelle, but rather it learned the relationship of organelles within a cell, by considering  
50 multiple organelles simultaneously. As such, it showed stable performance even within a variety of cells not  
51 used for learning. In particular, the cell-by-cell segmentation model operated in various cell lines without being  
52 limited to specific cells, based on the cell membrane and nuclear information. Finally, we demonstrate  
53 quantitative analyses of RAW 264.7 cells utilising morphological and biochemical properties by exploiting the  
54 linear correlation among RI, protein density, and the proposed segmentation models. The results suggest that the  
55 proposed method offers a new analytical approach for automatic cell studies.

## 1 Results

### 2 Deep-learning-based multi-organelle and cell-by-cell segmentation model

3 The proposed analysis process for live cells was primarily composed of two processes. First, we generated  
4 segmentation masks for individual cells and their organelles. Then, we obtained the morphological and physical  
5 properties (e.g., volume, surface area, and concentration), using each created segmentation mask and its RI  
6 values.

7 To this end, we utilised data-driven, deep-learning techniques. Specifically, we used two different 3D  
8 convolutional neural networks: one for the multi-organelle segmentation model, and the other for the cell-by-  
9 cell segmentation model, as depicted in Figure 1. The multi-organelle segmentation model predicts the  
10 segmentation mask of four organelles from the input 3D RI tomogram (Figure 1a); the nucleus, nucleolus,  
11 plasma membrane, and lipid droplet (Figure 1b). We selected these four organelles because they are commonly  
12 used in cell analysis. By learning various tasks simultaneously, the model learns the characteristics of individual  
13 organelles and their relationship with each other. This multi-task learning prevents overfitting<sup>18</sup> and significantly  
14 reduces computation time, compared to training each task separately.

15 The cell-by-cell segmentation model divides the membrane mask of the entire cell into the mask of each cell.

16 The model uses the nuclear and membrane masks obtained from the multi-organelle segmentation model results  
17 (Figure 1c). Assuming that each cell has at least one nucleus, a nucleus mask was used as the seed to separate  
18 individual cells. The membrane mask was used to distinguish regions between non-cell and cell areas. The  
19 details of the model are described in the **Online Methods** section.

20 We measured 129 3D QPI images of live NIH3T3 cells to train and evaluate the segmentation models described  
21 above. To generate ground-truth masks of the collected 3D QPI imagery, three expert biologists manually  
22 annotated the masks of individual cells and their four organelles using the open-source software called Insight  
23 Segmentation and Registration Toolkit (ITK)-Snap<sup>19</sup>. Thereafter, we split collected data into 105 training and 24  
24 evaluation datasets. Additionally, we used four different cell lines (A549, MDA-MB-231, HeLa, and RAW  
25 264.7) that were not used for training to confirm model generalizability, whereby each cell line was extracted  
26 from a different organ. A549 is a human lung carcinoma cell line, MDA-MB-231 is a human breast  
27 adenocarcinoma cell line, HeLa is a human cervical adenocarcinoma cell line, and RAW 264.7, a mouse  
28 macrophage cell line; nine 3D QPI images were captured for each cell line. These cell lines were used because

29 these cells represent the characteristics of other organs and because they have widely used cell lines in  
30 biological laboratories. The preparation of cell lines and the process of generating QPI data are detailed in the  
31 **Online Methods** section.

32 The Dice score was used to quantitatively measure the segmentation performance of the model. This is the most  
33 frequently used metric in image segmentation, quantifying the similarity between the ground truth and  
34 prediction masks (Eq. 3). The average Dice score of cell instance segmentation for the five cells was 0.758,  
35 while the average Dice score of membrane segmentation was 0.831. For the NIH3T3 and RAW 264.7 cells, the  
36 difference between the Dice score of membrane segmentation and that of cell-by-cell segmentation was  
37 marginal. However, for the remaining cells, the Dice score of cell-by-cell segmentation was slightly lower than  
38 that of membrane segmentation. As these cell lines were characterised by confluent growth, the resulting cell-  
39 by-cell segmentation tasks were very difficult. Likewise, the Dice scores of the nucleus segmentation for the  
40 NIH3T3 and Raw 264.7 cells were higher than the remaining cells. The variation in the Dice score for nucleolus  
41 segmentation was relatively small; this is because the RI of the nucleolus is similar between cells. The Dice  
42 score of the lipid droplet segmentation was far lower than other organelles, as the volume of the lipid droplet  
43 was relatively small compared to the other subcellular organelles. A small portion of false-positive and false-  
44 negative predictions may significantly reduce the Dice score when the total volume of the mask is small.

45 Next, we conducted a qualitative assessment using experts (Figure 2). The cell-by-cell segmentation model  
46 performed well in the A549, MDA-MB-231, HeLa, and RAW 264.7 cell lines, which were not used for training.  
47 Each of the five cell lines had different shape characteristics in the subcellular organelles. NIH3T3 has a small  
48 apparent nucleus, a small number of nucleoli, and a long and overlapping membrane structure. The A549 cells  
49 also had an evident trim nucleus, although they possessed one or two large nucleoli, and had thin membrane  
50 with large lipid droplets. The HeLa cells have a large prominent nuclear membrane and a small number of  
51 nucleoli in the nucleus, with a thicker membrane than A549 cells. The MDA-MB-231 cells were possessed, but  
52 it has one or two large nucleoli. The morphology of RAW 264.7 cells completely differed from that of the four  
53 other cell lines; the size of RAW 264.7 cells was smaller than that of the other five cell lines; moreover, the  
54 RAW 264.7 cells had a spiky circular membrane. The size of the nucleus was sufficiently large to make up most  
55 of the cells. We applied the model to cell lines with different characteristics and observed that it worked very  
56 well with various cell lines. Additionally, the masks produced by 3D cell segmentation showed better  
57 morphological features of cells and subcellular organelles (Figure 3).

## 58 Quantitative cell analysis using segmented masks

59 To analyse live cells, we utilised volume, surface area, and concentration. Volume was computed by multiplying  
60 the total number of voxels in the segmentation masks and the volume of the 3D QPI image. To compute surface  
61 area, we constructed a triangular mesh from the 3D segmentation masks. Concentration was calculated as per  
62 Equation (1):

$$63 \quad \text{Concentration} = \left( \frac{1}{N} \sum_i^N n_i - n_0 \right) / RII \quad (1)$$

64 where  $N$  is the index of the set of the segmentation mask;  $n_i$  is the RI of the voxel;  $n_0$  is the RI of the  
65 surrounding media (1.3337); the RII is a constant set as 0.135 for the lipid droplet and as 0.19 for the remaining  
66 organelles.

67 Macrophages are white blood cells that play an essential role in the innate immune system. Macrophages  
68 phagocytose bacteria, secreting proinflammatory and antimicrobial mediators<sup>20</sup>. Macrophages induce the  
69 transcription of genes that encode proinflammatory regulators, such as the transcription factor activator protein 1  
70 (AP-1), and the c-Jun N-terminal kinase (JNK). This is achieved through exposure to environmental stimuli,  
71 known as macrophage activation<sup>21</sup>. Activated macrophages are also known to change phenotypes, although the  
72 details are not well defined. Activated macrophages have two different phenotypes depending on exposure  
73 stimuli: M1 and M2. Macrophage polarisation causes different behaviours in the immune system, and alters cell  
74 shape differently<sup>22</sup>. Although the critical relationship between cell shape and the function of macrophages has  
75 been studied, there is little research on the quantitative analysis of shape changes in whole cells and subcellular  
76 organelles. We hypothesised that macrophage activation would affect gene and protein expression, and the  
77 morphology and physical characteristics of cells and subcellular organelles. To achieve this, a mouse  
78 macrophage cell line, RAW 264.7, was used as a model, and macrophage activation was induced through  
79 treatment with bacterial lipopolysaccharides (LPS).

80 Without requiring secondary assays, 3D QPI was able to directly observe and calculate morphological and  
81 biochemical changes in activated RAW 264.7 cells. The 3D RI tomogram of LPS-treated RAW 264.7 cells  
82 showed that activated cells undergo dramatic morphological changes within 24 h (Supplementary Figure 2). The  
83 control RAW 264.7 cells were characterised by the circular shape of a typical macrophage cell, slightly attached  
84 to the bottom of the culture dish. However, 8 h after LPS treatment, these RAW 264.7 cells began expanding in  
85 volume and attached themselves to the bottom of the dish. At 24 h, the attached cells formed lamellipodia and

86 granules in the cytosol (Supplementary Figure 2). We attempted to track and calculate the changing parameters  
87 of RAW 264.7 cells for 8.5 h during the activation process as these RAW 264.7 cells dynamically altered their  
88 shape during the initial response to LPS treatment.

89 The 3D RI tomogram of LPS-treated RAW 264.7 and untreated control cells were acquired every 30 min for up  
90 to 8.5 h on a 3D QPI microscope in label-free states. The 3D cell segmentation was conducted with every time-  
91 lapse image, generating subcellular organelle masks (Figure 4a). The generated masks represent the changing  
92 phenotype of the activating macrophage process. The membrane masks perfectly represented the spreading  
93 morphology of activated macrophages overtime in 3D. Figure 4a shows that the verified volume of activated  
94 macrophages had become bigger and wider through the membrane mask. In addition to the *xy* slices, the *yz*, and  
95 *xz* slices enabled easy identification of the increased volume of the cell membrane through the generated mask.  
96 The subcellular organelle masks of the nucleus and nucleolus and lipid droplet were acquired from label-free  
97 holographic imagery. Although the size of the nucleus appears to grow along the cell membrane, retention trends  
98 were observed in the nucleolus compared to the membrane and the nucleus. The most noticeable changes were  
99 observed in lipid droplets; during inflammation, when macrophages recognise inflammatory stimuli such as  
100 bacterial LPS, they induce the accumulation of cholesterol esters and triglycerides in their own body<sup>23</sup>. The  
101 model was able to precisely separate lipid droplets, and these represent the increasing size of the fat and lipid  
102 droplets, as shown in previous studies. At 0 min, the number and size of lipid droplets were small, while 8.5 h  
103 after LPS exposure, the size and number of lipid droplets had increased. Figure 4b presents the mean changes in  
104 the RI value for the RAW 264.7 cells during the LPS-induced activation process. We measured the protein  
105 concentration, surface area, and volume of individual masks from the RI value, tracking these parameters  
106 overtime. Consistent with the cell spreading observed in Figure 4a and Supplementary Figure 2, the volume and  
107 surface area of RAW 264.7 cells significantly increased after 8 h activation. The mean RI of the RAW 264.7 cell  
108 membranes commenced decreasing immediately after LPS treatment, and continued to decrease steadily after  
109 8.5 h of time-lapse measurements. Although the protein concentration of the membrane decreased, the surface  
110 area and volume of the membrane increased gradually for 8.5 h (Figure 4a). The nucleus, similar to the  
111 membrane, tended to decrease RI and protein concentrations. While the volume and surface area of the nucleus  
112 increased, it was confirmed that the volume and area of the nucleolus slightly increased at the beginning, and  
113 was maintained for 8.5 h. For the lipid droplets with very high RI compared to other subcellular organelles (e.g.,  
114 the nucleus and nucleolus), it was observed that the RI was maintained during the activation process for 8.5 h.



115 The surface area and volume of lipid droplets increased during macrophage activation compared to the control  
116 cells, similar to the membrane and nucleus. These observations suggest that LPS-induced changes in  
117 macrophages occur phenotypically, and manifest in physical changes. We compared the individual masks of  
118 subcellular organelles from the start point to end point of time-lapse data (Figure 4c). The mean RI of each  
119 organelle decreased rapidly for 8.5 h, although the volume and surface area increased. The results indicate that  
120 RAW 264.7 cells were increasing in size while losing their concentration during the activation process. This  
121 occurred throughout the whole cell and in subcellular organelles, including the nucleus, nucleolus, and lipid  
122 droplets.

123

## 124 **Discussion and Conclusion**

125 The results show that the proposed framework, combining 3D QPI with deep neural network-based  
126 segmentation models, enables label-free 3D live cell analysis in an automated manner. The proposed framework  
127 predicts the segmentation mask of organelles within individual cells and uses RI to provide physical and  
128 morphological information on cells and organelles. In particular, to automatically segment each cell, we  
129 assumed that each cell had at least one nucleus. We used the predicted nucleus segmentation mask of the cell as  
130 seed information to distinguish each cell. The proposed framework did not target specific organelles. Rather, it  
131 predicted multiple organs concurrently. By training the model to segment several organelles simultaneously, the  
132 model learned the relationship of organelles and showed stable performance even in various cell lines not used  
133 for training. We also demonstrated that existing biological knowledge may be confirmed through the proposed  
134 framework by automatically tracking and observing cell dynamics in time-lapse data.

135 To the best of our knowledge, this work is the first of its type to analyse various 3D cell organelles  
136 simultaneously and automatically at an instance level. An immediate future research priority lies in further  
137 improving model performance. Introducing Bayesian neural networks<sup>23</sup> and stable learning methodologies using  
138 uncertainty prediction<sup>24, 25</sup> should be considered for a more robust model. In future research, this framework  
139 should be expanded to refine the predicted segmentation masks utilising user interactions. When combined with  
140 cell lineage tracking technology, changes in the temporal differentiation process of cells may be automatically  
141 monitored. In addition, it can support real-time analysis by improving the efficiency of networks to process large  
142 3D imagery.

143

144

## 145 **Online Methods**

### 146 **Deep-Learning Models**

#### 147 **Subcellular organelle segmentation**

148 The multi-organelle segmentation model uses a 3D RI tomogram image as input and predicts the binary mask of  
149 four organelles: the nucleus, nucleolus, membrane, and lipid droplets (Supplementary Figure 1). We train the  
150 model to predict the mask of four different organelles simultaneously, as opposed to training an independent  
151 model for each organelle. This approach, known as multi-task learning, improves the overall performance of  
152 multiple tasks<sup>18</sup>. In addition, the model training time was drastically reduced by using only a single model.

153 3D RI tomogram images have high resolutions, varying from 100×600×600 to 260×860×860 voxels. As such,  
154 training the subcellular organelle segmentation model using the entire volume requires a huge graphics  
155 processing unit (GPU) memory. For this reason, during the training phase, we initially resized the input 3D RI  
156 tomogram to 128×512×512 voxels. Then, we randomly sampled patches of 64×128×128 from the resized 3D  
157 RI tomogram and utilised these as inputs. The model predicted the probability map for each subcellular  
158 organelle producing an identical resolution to the input patch.

159 During the inference phase, we resized the input to 128×512×512 voxels and applied a 64-size symmetric  
160 padding. We cropped the input image from the centre along the  $z$  axis with the size of 64. Then, we uniformly  
161 generated patches of 64×128×128 with a stride of 128 and obtained probability maps for each patch. We  
162 reconstructed the predicted patches into the entire volume of the image by stitching patches using a spline  
163 kernel. Following this, we removed the padding area from the stitched probability maps and restored them to the  
164 original resolution. Finally, we obtained the segmentation mask by binarising the probability map using a  
165 threshold of 0.5.

#### 166 **Cell-by-cell segmentation**

167 To predict the instance masks of cells, the cell-by-cell segmentation model utilises segmentation masks of the  
168 nuclei and the membrane predicted by the subcellular organelle segmentation model. The nuclei mask was used  
169 as prior information regarding the number of cells and their approximate location. The membrane mask  
170 prevented the model from predicting the background area as the cell. The model initially separated the predicted  
171 nuclei mask into the instance masks of the nucleus,  $n_i \in R^{D \times H \times W}$ , where  $i \in \{1, \dots, k\}$  indicates the index of  
172 nuclei; and  $k$  is the total number of nuclei. As the nuclei of cells were separated, the instance masks of the

173 nucleus were simply obtained using a connected component algorithm. Then, we selected the  $i^{\text{th}}$  nucleus  
174 instance mask,  $n_i$ , and considered this a positive map,  $pos_i$ ; the remaining nuclei instances were considered a  
175 negative map,  $neg_i$ . We concatenated the membrane mask,  $m$ , and  $pos_i$  and  $neg_i$  to  $I$ , predicting the  
176 instance probability map ( $x_i$ ) of the cell that includes the selected nucleus instance ( $n_i$ ).

177 During the training phase, we randomly selected one nucleus instance and trained the model to predict the  
178 instance mask of the selected cell. During the inference phase, the model repeated this process for each nucleus  
179 and finally obtained the instance mask by assigning the index of the nucleus that has the highest probability:  
180  $M = \text{argmax}_{i=1, \dots, N} x_i$ , where  $N$  is the number of nuclei. We considered a voxel as the background if the  
181 highest probability was lower than the 0.5 threshold.

182 In contrast to the subcellular organelle segmentation task, the patching strategy was not applicable to the cell-  
183 by-cell segmentation task as the whole-cell shape was critical when predicting the instance mask. Therefore, we  
184 downsized inputs to  $128 \times 128$  in the  $x$  and the  $y$  axes, and cropped the resized inputs along the  $z$  axis to the size  
185 of 64. Then, we restored the predicted instance mask to the original size of the inputs.

## 186 **Network architecture and training details**

187 The 3D U-Net-based architecture was adopted<sup>26</sup>, and this was demonstrated to have impressive performance in  
188 biomedical image segmentation tasks, as per these models. Specifically, we employed the Scalable Neural  
189 architecture search (ScNas)<sup>27</sup>, which automatically designs the architecture optimised for 3D cell image  
190 segmentation. ScNas identifies network parameters and micro-level architectures by utilising a stochastic  
191 sampling algorithm. Similar to the U-Net, the constructed networks were composed of encoder and decoder  
192 cells; encoder cells extract feature maps at multiple scales by gradually downscaling resolution, while decoder  
193 cells up-sample the extracted feature maps to the original resolution and classify the label of voxels. Each cell  
194 consists of repeated stacks of 3D convolutional layers, a rectified linear unit (ReLU), pooling operations, and  
195 normalisation layers; we utilised the constructed networks for subcellular organelle and cell-by-cell  
196 segmentations.

197 We selected the activation and normalisation functions of ScNas as Leaky-ReLU<sup>28</sup> and instance normalisation<sup>29</sup>,  
198 respectively. The size of the initial feature map, the number of layers, and the feature map multiplier were set to  
199 12, 8, and 3, respectively. Hyper-parameters of the network were adjusted using a grid search algorithm. The  
200 models were implemented in Python 3.7, using the PyTorch 1.4 framework on an 8 V100-32G GPU machine.

201 Several data augmentation strategies were applied, such as random flipping, cropping, and rotation. In  
202 particular, the input image was rescaled from 0.5 to 2 to handle varying resolutions of 3D RI tomography. We  
203 utilised the Adam<sup>30</sup> optimiser with the learning rate of 0.001, and reduced the learning rate by the factor of 5 if  
204 there was no improvement in the validation metric for 30. To train the models, we combined the Dice loss and  
205 the binary cross entropy (BCE) loss; this is defined as:

$$206 \quad l = l_{dice} + l_{bce}, \quad l_{dice} = \frac{2 \sum_i^N p_i g_i}{\sum_i^N p_i \sum_i^N g_i}, \quad l_{bce} = -\frac{1}{N} \sum_i^N g_i \cdot \log(p_i) + (1 - g_i) \cdot \log(1 - p_i) \quad (2)$$

207 where  $N$  is the number of voxels; and  $p_i$  and  $g_i$  indicate the predicted probability and the ground-truth label  
208 of the  $i^{\text{th}}$  voxel, respectively. For the multi-organelle segmentation task, we trained the model to conduct  
209 multiple tasks simultaneously; thus, the loss for each subcellular organelle was calculated and the sum of all  
210 losses was determined. For cell-by-cell segmentation, we simply computed the loss between a selected instance  
211 mask and its prediction.

## 212 **Metrics**

213 For quantitative evaluation, we adopted a Dice coefficient that measures the similarity between the predicted  
214 mask and the corresponding ground-truth mask; this coefficient is defined as:

$$215 \quad Dice(G, P) = 2 \frac{|G \cap P|}{|G \cup P|}, \quad (3)$$

216 where  $G$  is the ground-truth mask; and  $P$  is the predicted mask. For the cell-by-cell segmentation task, the  
217 Dice coefficient score,  $Dice(P_i, G_j)$ , was determined for all pairs of instance masks associated with the  
218 prediction and the ground-truth. Then, we applied the Hungarian algorithm<sup>31</sup> to assign the prediction ( $P_i$ ) to  
219 ground-truth ( $G_j$ ), which had the highest Dice score.

## 220 **Cell line and cell culture**

221 The NIH3T3, A549, HeLa, and RAW 264.7 cell lines were purchased from the Korean Cell Line Bank (KCLB,  
222 Seoul, Korea) and cultured in Dulbecco's modified Eagle's medium (DMEM; high glucose) (Hyclone,  
223 SH30243) supplemented with 10% (vol/vol) fetal bovine serum (FBS; Hyclone, SH30084) and 1% antibiotic-  
224 antimycotic solution (Thermo Fisher Scientific). The MDA-MB-231 cells were purchased from the Korean Cell  
225 Line Bank (KCLB, Seoul, Korea) and maintained in RPMI-1640 medium (Hyclone, SH30027) supplemented  
226 with 10% (vol/vol) FBS (Hyclone, SH30084) and antibiotic-antimycotic solution (Thermo Fisher Scientific).

## 227 **LPS treatment in RAW 264.7 cells and plating on TomoDish**

228 Precisely, 30  $\mu$ L of LPS (100  $\mu$ g/mL stock, List Biological Laboratories) from *Escherichia coli* was added to 3  
229 mL of Dulbecco's Modified Eagle Medium supplemented with 10% FBS and 1% antibiotic-antimycotic;  
230  $3.0 \times 10^5$  RAW 264.7 cells, a mouse macrophage cell line, were counted and added to a 15 mL tube, and cells  
231 were centrifuged at  $100 \times g$  for 5 min to collect cell pellets. The supernatant medium was removed using  
232 suction, and the cell pellet was gently resuspended in 3 mL of LPS-containing medium. Then 3 mL of medium  
233 with RAW 264.7 cells were moved to the TomoDish (Tomocube, Inc.).

## 234 **The 3D QPI**

235 The 3D RI images of cells were obtained using a commercial holotomography (HT-2H, Tomocube Inc.,  
236 Republic of Korea), based on Mach-Zehnder interferometry equipped with a digital micromirror device (DMD).  
237 A coherent monochromatic laser ( $\lambda = 532$  nm) was divided into two paths, a reference and a sample beam,  
238 using a  $2 \times 2$  single-mode fibre coupler. A 3D RI tomogram was reconstructed from multiple 2D holographic  
239 images acquired from 49 illumination conditions, a normal incidence, and 48 azimuthally symmetric directions  
240 with a polar angle ( $64.5^\circ$ ). The DMD was used to control the angle of the illumination beam impinging on the  
241 sample<sup>32</sup>. The diffracted beams from the sample were collected using a high numerical aperture (NA) objective  
242 lens (NA=1.2, UPLSAP 60XW, Olympus). To compensate the missing cone issue due to the limited NA, a  
243 regularization algorithm based on non-negativity was used<sup>33</sup>. The off-axis hologram was recorded using a  
244 complementary metal oxide semiconductor image sensor (FL3-U3-13Y3MC, FLIR Systems). The visualisation  
245 of the 3D RI maps and its correlative 3D fluorescence signal with red pseudo-colour was carried out using  
246 commercial software (TomoStudio<sup>TM</sup>, Tomocube Inc.). The details on the principle and reconstruction  
247 algorithms can be found elsewhere<sup>34,35</sup>.

## 248 **Time-lapse imaging using a holotomography microscope**

249 Prior to 3D QPI imaging, the HT-2H (Tomocube, Inc.) was turned on to warm up the laser for at least 30 min.  
250 Additionally, the carbon dioxide (CO<sub>2</sub>) gas mixer and temperature controller were turned on to maintain a  
251 temperature of 37°C and an atmosphere with 5% CO<sub>2</sub> in the TomoChamber (Tomocube, Inc.). The water  
252 reservoir of the TomoChamber (Tomocube, Inc.) was filled with autoclaved distilled water to maintain humidity  
253 during imaging.

254 Immediately after LPS treatment, RAW 264.7 cells containing TomoDish were mounted on the TomoChamber,

255 and this chamber was then gently mounted on the HT-2H stage. Then, the HT-2H was calibrated, and the  
256 acquisition tab was used to begin setting up time-lapse imaging. For RAW 264.7 cell time-lapse imaging, 3D  
257 QPI images were taken at 15 different positions every 30 min for 17 counts; this was completed in 8.5 h to  
258 acquire 3D QPI time-lapse imagery.

## 259 **Acknowledgments**

260 This work was supported by KAIST UP program, BK21+ program, Tomocube, National Research Foundation  
261 of Korea (2017M3C1A3013923, 2015R1A3A2066550, 2018K000396, 2019R1A2C4070420,  
262 2020R1A2C3014742), and Institute of Information & communications Technology Planning & Evaluation  
263 (IITP) grant funded by the Korea government (MSIT) (2021-0-00745, 2019-0-00075).

## 264 **Author Contributions**

265 S. Lee, H. Min, and Y.K. Park conceived the idea. J. Choi, H.-J. Kim, G. Sim carried out the measurements and  
266 analyses. J. Choi, G. Sim, J. Choo, and H. Min designed, implemented and optimized the deep learning pipeline.  
267 H.-J. Kim, S. Lee, W.-S. Park, J. Park, H. Kang designed the experiments, collected data. S. Lee and W.-S. Park  
268 established the molecular biology and imaging. All the authors wrote the manuscript. Y.K. Park supervised the  
269 work.

## 270 **Statement of Competing Interests**

271 J. Choi, H.-J. Kim, S. Lee, W.-S. Park, J. Park, H. Kang, and Y.K. Park have financial interests in Tomocube  
272 Inc., a company that commercialises optical diffraction tomogram, and quantitative phase imaging instruments  
273 and is one of the sponsors of the work.

## 274 References

- 275 1. Valm, A.M. et al. Applying systems-level spectral imaging and analysis to reveal the organelle  
276 interactome. *Nature* **546**, 162-167 (2017).
- 277 2. Guo, M. et al. Cell volume change through water efflux impacts cell stiffness and stem cell fate.  
278 *Proceedings of the National Academy of Sciences* **114**, E8618-E8627 (2017).
- 279 3. McQuin, C. et al. CellProfiler 3.0: Next-generation image processing for biology. *PLoS biology* **16**,  
280 e2005970 (2018).
- 281 4. Jonkman, J., Brown, C.M., Wright, G.D., Anderson, K.I. & North, A.J. Tutorial: guidance for  
282 quantitative confocal microscopy. *Nature protocols* **15**, 1585-1611 (2020).
- 283 5. Coutu, D.L., Kokkaliaris, K.D., Kunz, L. & Schroeder, T. Multicolor quantitative confocal imaging  
284 cytometry. *Nature methods* **15**, 39-46 (2018).
- 285 6. Park, Y., Depeursinge, C. & Popescu, G. Quantitative phase imaging in biomedicine. *Nature photonics*  
286 **12**, 578-589 (2018).
- 287 7. Esposito, M. et al. TGF- $\beta$ -induced DACT1 biomolecular condensates repress Wnt signalling to  
288 promote bone metastasis. *Nature cell biology* **23**, 257-267 (2021).
- 289 8. Ahn, J.H. et al. Enhanced succinic acid production by *Mannheimia* employing optimal malate  
290 dehydrogenase. *Nature communications* **11**, 1-12 (2020).
- 291 9. Oh, J. et al. Three-dimensional label-free observation of individual bacteria upon antibiotic treatment  
292 using optical diffraction tomography. *Biomedical optics express* **11**, 1257-1267 (2020).
- 293 10. Kim, S. et al. PRMT6-mediated H3R2me2a guides Aurora B to chromosome arms for proper  
294 chromosome segregation. *Nature communications* **11**, 1-15 (2020).
- 295 11. Wang, Y., Zhang, Z., Wang, H. & Bi, S. Segmentation of the clustered cells with optimized boundary  
296 detection in negative phase contrast images. *PloS one* **10**, e0130178 (2015).
- 297 12. Kesler, B., Li, G., Thiemicke, A., Venkat, R. & Neuert, G. Automated cell boundary and 3D nuclear  
298 segmentation of cells in suspension. *Scientific reports* **9**, 1-9 (2019).
- 299 13. Sandoz, P.A., Tremblay, C., van der Goot, F.G. & Frechin, M. Image-based analysis of living  
300 mammalian cells using label-free 3D refractive index maps reveals new organelle dynamics and dry  
301 mass flux. *PLoS biology* **17**, e3000553 (2019).
- 302 14. Lee, J. et al. Deep-learning-based label-free segmentation of cell nuclei in time-lapse refractive index  
303 tomograms. *Ieee Access* **7**, 83449-83460 (2019).
- 304 15. Kandel, M.E. et al. Reproductive outcomes predicted by phase imaging with computational specificity  
305 of spermatozoon ultrastructure. *Proceedings of the National Academy of Sciences* **117**, 18302-18309  
306 (2020).
- 307 16. Park, S. et al. Label-free tomographic imaging of lipid droplets in foam cells for machine-learning-  
308 assisted therapeutic evaluation of targeted nanodrugs. *ACS nano* **14**, 1856-1865 (2020).
- 309 17. Lee, M. et al. Deep-learning-based three-dimensional label-free tracking and analysis of  
310 immunological synapses of CAR-T cells. *Elife* **9**, e49023 (2020).
- 311 18. Zhang, Y. & Yang, Q. A survey on multi-task learning. *IEEE Transactions on Knowledge and Data*  
312 *Engineering* (2021).
- 313 19. Yushkevich, P.A., Gao, Y. & Gerig, G. in 2016 38th Annual International Conference of the IEEE  
314 Engineering in Medicine and Biology Society (EMBC) 3342-3345 (IEEE, 2016).
- 315 20. Hirayama, D., Iida, T. & Nakase, H. The phagocytic function of macrophage-enforcing innate  
316 immunity and tissue homeostasis. *International journal of molecular sciences* **19**, 92 (2018).
- 317 21. Hambleton, J., Weinstein, S.L., Lem, L. & DeFranco, A.L. Activation of c-Jun N-terminal kinase in  
318 bacterial lipopolysaccharide-stimulated macrophages. *Proceedings of the National Academy of*  
319 *Sciences* **93**, 2774-2778 (1996).
- 320 22. McWhorter, F.Y., Wang, T., Nguyen, P., Chung, T. & Liu, W.F. Modulation of macrophage phenotype  
321 by cell shape. *Proceedings of the National Academy of Sciences* **110**, 17253-17258 (2013).
- 322 23. Feingold, K.R. et al. Mechanisms of triglyceride accumulation in activated macrophages. *Journal of*  
323 *leukocyte biology* **92**, 829-839 (2012).
- 324 24. Gal, Y. & Ghahramani, Z. in international conference on machine learning 1050-1059 (PMLR, 2016).
- 325 25. Kendall, A. & Gal, Y. What uncertainties do we need in bayesian deep learning for computer vision?  
326 *arXiv preprint arXiv:1703.04977* (2017).
- 327 26. Çiçek, Ö., Abdulkadir, A., Lienkamp, S.S., Brox, T. & Ronneberger, O. in International conference on  
328 medical image computing and computer-assisted intervention 424-432 (Springer, 2016).
- 329 27. Kim, S. et al. in International Conference on Medical Image Computing and Computer-Assisted  
330 Intervention 220-228 (Springer, 2019).



- 331 28. Xu, B., Wang, N., Chen, T. & Li, M. Empirical evaluation of rectified activations in convolutional  
332 network. *arXiv preprint arXiv:1505.00853* (2015).
- 333 29. Ulyanov, D., Vedaldi, A. & Lempitsky, V. Instance normalization: The missing ingredient for fast  
334 stylization. *arXiv preprint arXiv:1607.08022* (2016).
- 335 30. Kingma, D.P. & Ba, J. Adam: A method for stochastic optimization. *arXiv preprint arXiv:1412.6980*  
336 (2014).
- 337 31. Kuhn, H.W. The Hungarian method for the assignment problem. *Naval research logistics quarterly* **2**,  
338 83-97 (1955).
- 339 32. Shin, S., Kim, K., Yoon, J. & Park, Y. Active illumination using a digital micromirror device for  
340 quantitative phase imaging. *Optics letters* **40**, 5407-5410 (2015).
- 341 33. Lim, J. et al. Comparative study of iterative reconstruction algorithms for missing cone problems in  
342 optical diffraction tomography. *Optics express* **23**, 16933-16948 (2015).
- 343 34. Kim, K. et al. Optical diffraction tomography techniques for the study of cell pathophysiology. *Journal*  
344 *of Biomedical Photonics & Engineering* **2** (2016).
- 345 35. Kim, K. et al. High-resolution three-dimensional imaging of red blood cells parasitized by Plasmodium  
346 falciparum and in situ hemozoin crystals using optical diffraction tomography. *Journal of biomedical*  
347 *optics* **19**, 011005 (2013).

348

349

350 **Figure Legends**

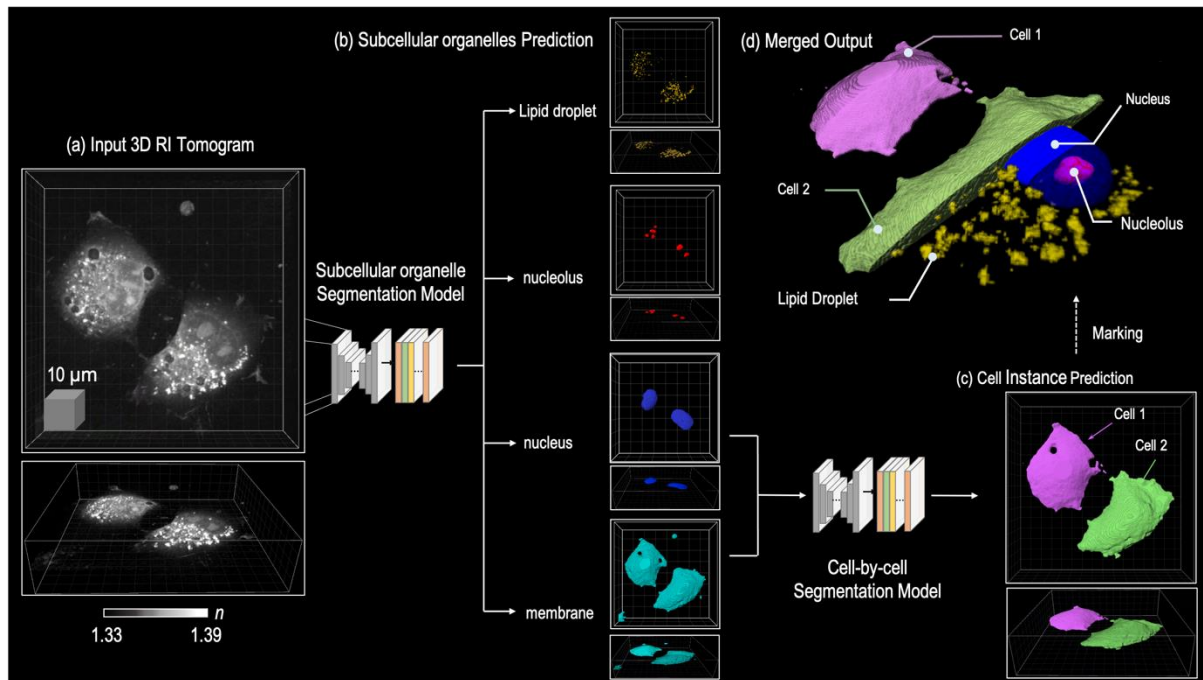

352 **Figure 1. Overview of the multi-organelle segmentation and cell-by-cell segmentation models. (a)** From the  
353 input 3D Tomogram, multi-organelle segmentation model predicts segmentation masks of four subcellular  
354 organelles: the membrane, nucleus, nucleolus, and lipid droplets. **(b)** Cell-by-cell segmentation model predicts  
355 instance masks by utilising the predicted membrane and nucleus masks. **(c)** Examples of predicted segmentation  
356 masks.

357

358

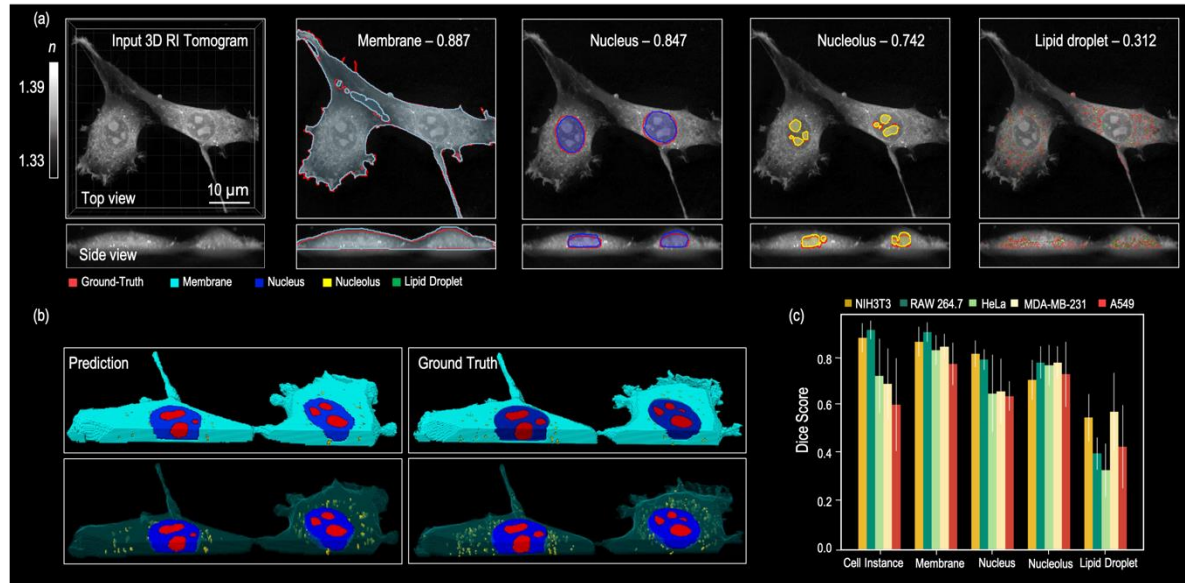

359

360 **Figure 2. Quantitative results and examples of Dice scores with corresponding prediction and ground-**

361 **truth masks. (a)** The numbers indicate Dice scores between prediction and ground-truth masks; the 2D slices of

362 prediction masks and ground-truth masks are overlaid. **(b)** 3D masks of predictions and ground-truth. **(c)**

363 Quantitative results on the NIH3T3, RAW 264.7, HeLa, MDA-MB-231, and A549 cells.

364

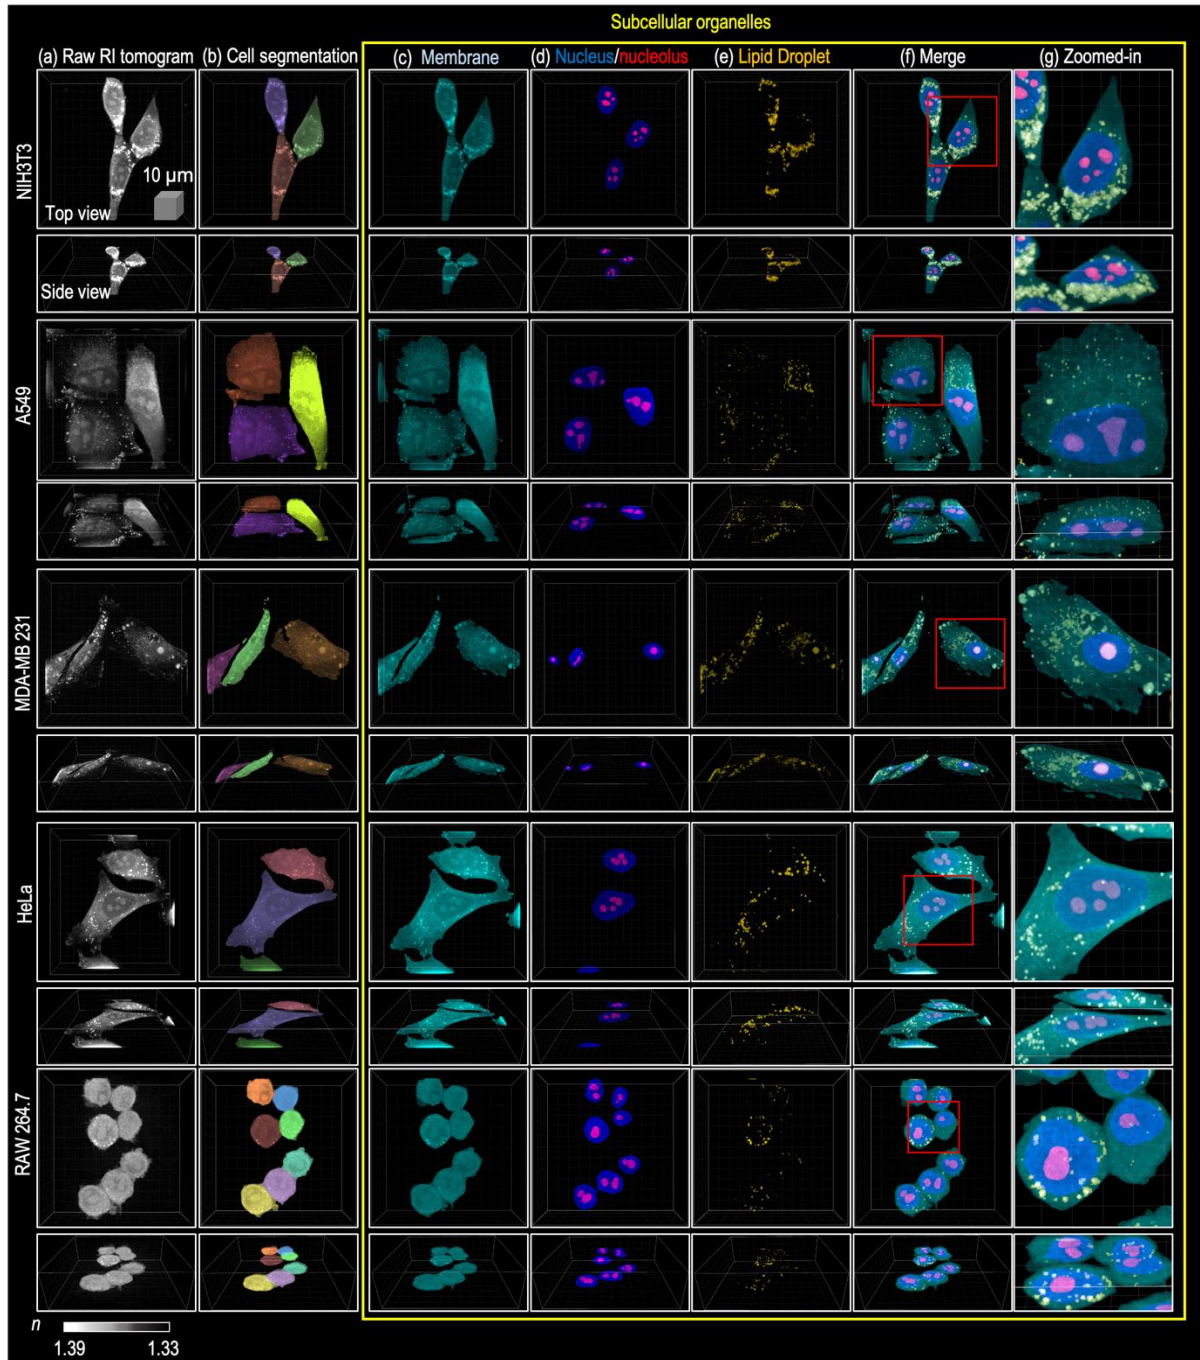

365

366

367

368

369

**Figure 3. Examples of qualitative results for the NIH3T3, A549, MDA-MB-231, HeLa, and RAW 264.7 cells. (a) 3D Input Tomogram. (b) Segmentation masks of cell instances. (c) Segmentation masks of membrane. (d) Segmentation masks of nucleus and nucleolus. (e) Segmentation masks of lipid droplet. (f) Merged segmentation masks of four subcellular organelles. (g) Zoomed-in patches of inputs.**

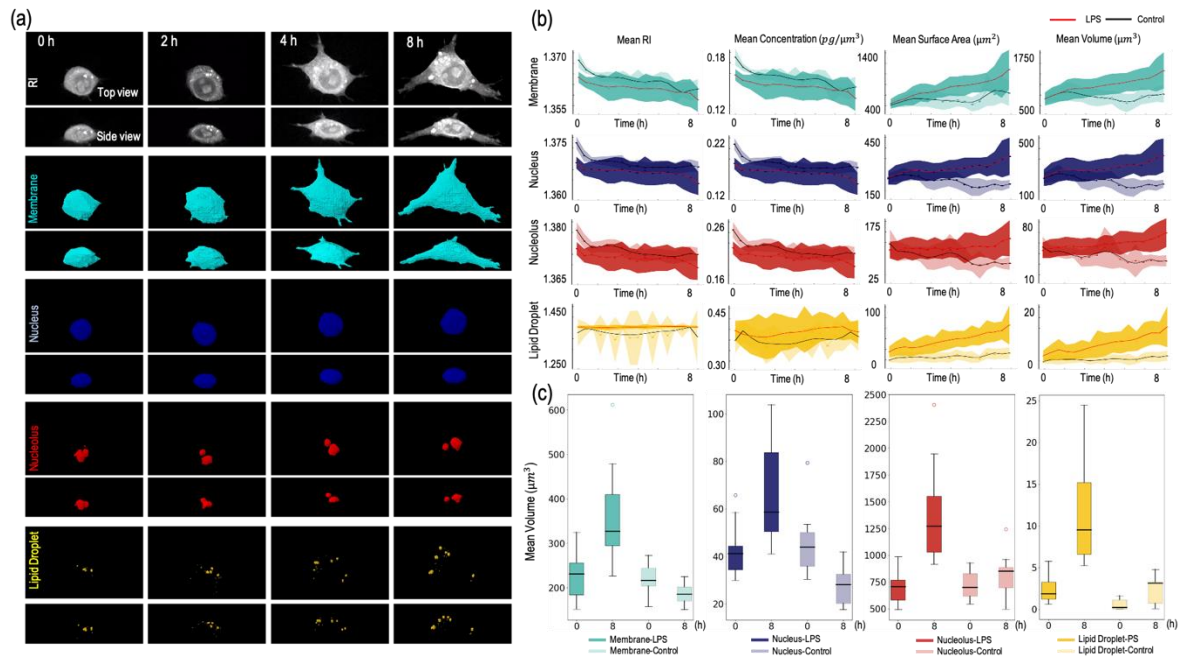

370

371 **Figure 4. Application to time-lapse imagery of RAW 264.7 cells. (a)** Horizontal plane and coronal plane view

372 of RAW 264.7 cells overtime (0, 2, 4, 8 h). Each panel represents the RI tomogram and segmentation masks of

373 the membrane, nucleus, nucleolus, and lipid droplet. **(b)** The black line and the light shades show the control,

374 LPS-untreated RAW 264.7 cells (n=9), while the red line and the dark shades show LPS-treated, activating

375 RAW 264.7 cells (n=12). The mean RI and mean protein concentration decreased by activation, while mean

376 surface area and mean volume increased during activation. **(c)** Box plots representing the minimum to maximum

377 and showing all points of the mean volume of subcellular organelles in the RAW 264.7 cells.
